# Supplementary material for: Time-dependent evolution of the Bi3.64Mo0.36O6.55/Bi2MoO6 heterostructure for enhanced photocatalytic activity via the interfacial hole migration
Source: Royal Society of Chemistry journal article supplement (doi:10.1039/c5nr02745d), 2015-01-01
Supplement: c5nr02745d1.pdf [file c5nr02745d1.pdf]

## Supporting Information:

### **Time-dependent Evolution of $\text{Bi}_{3.64}\text{Mo}_{0.36}\text{O}_{6.55}/\text{Bi}_2\text{MoO}_6$ Heterostructure for Enhanced Photocatalytic Activity *via* the Interfacial Hole Migration**

Zan Dai,<sup>a</sup> Fan Qin,<sup>a</sup> Huiping Zhao,<sup>a</sup> Fan Tian,<sup>a</sup> Yunling Liu<sup>b</sup> and Rong Chen<sup>\*a</sup>

<sup>1</sup> *Key Laboratory for Green Chemical Process of Ministry of Education and School of Chemistry and Environmental Engineering, Wuhan Institute of Technology, Xiongchu Avenue, Wuhan, 430073, PR China*

<sup>2</sup> *State Key Laboratory of Inorganic Synthesis and Preparative Chemistry, College of Chemistry, Jilin University, Changchun, 130012, PR China*

*\* Corresponding author: Prof. R. Chen, E-mail: rchenhku@hotmail.com*

*Tel.: (+86)13659815698; fax: (+86)2787195680.*

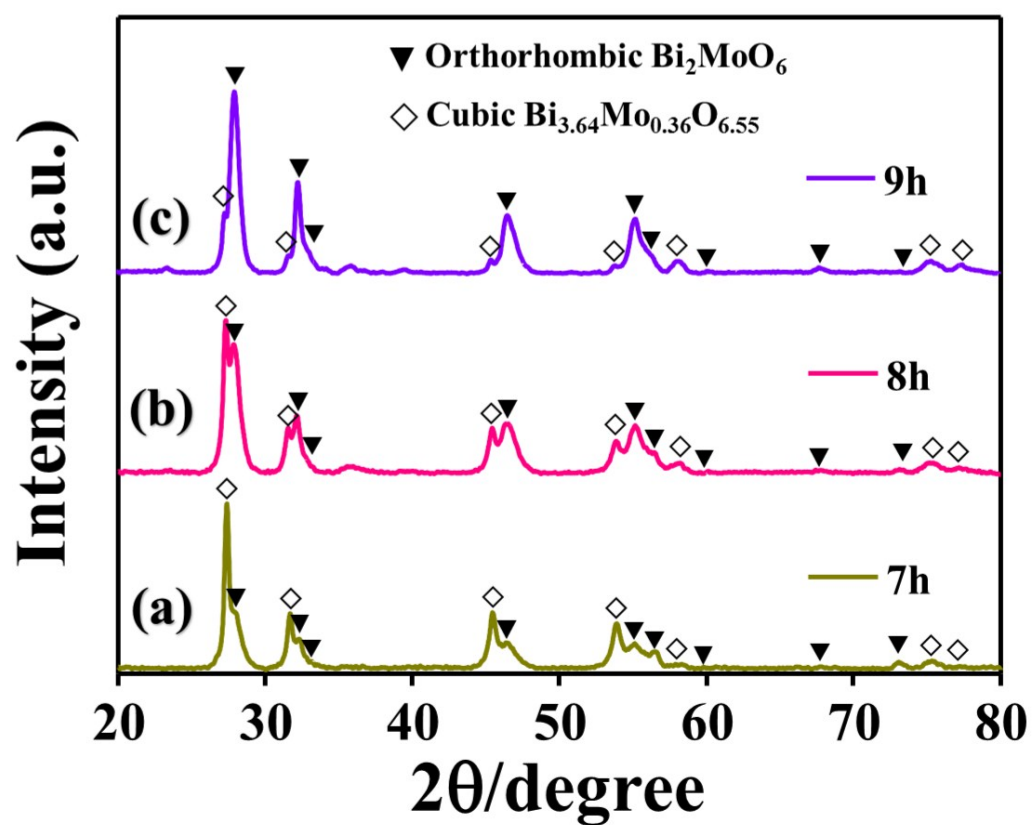

**Fig. S1** XRD patterns of **BMO** samples obtained at different hydrothermal intervals. (a) 7 h; (b) 8 h; (c) 9 h.

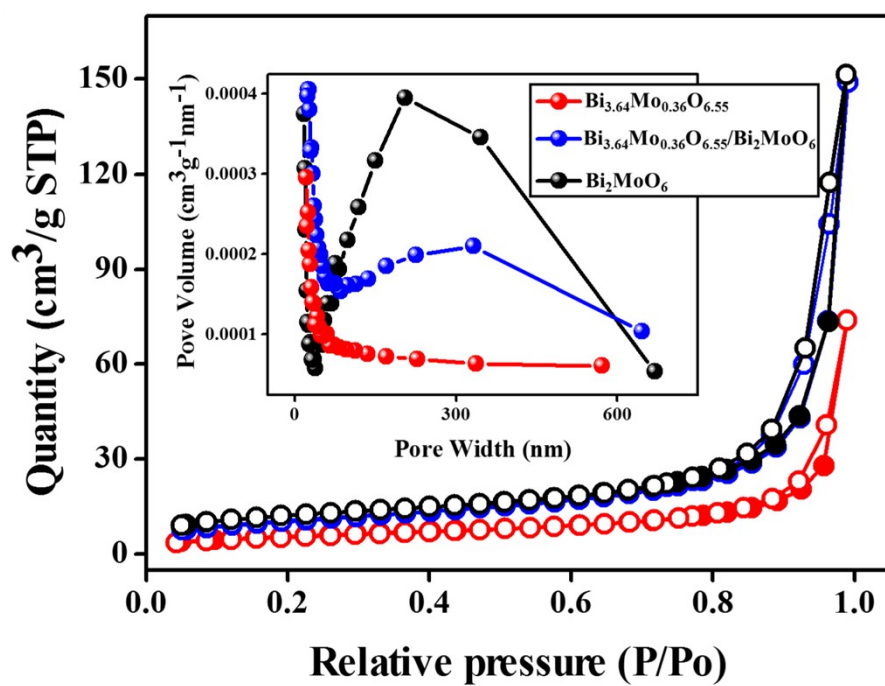

**Fig. S2** N<sub>2</sub> adsorption–desorption isotherms and pore size distributions (insert) of **BMO** samples.

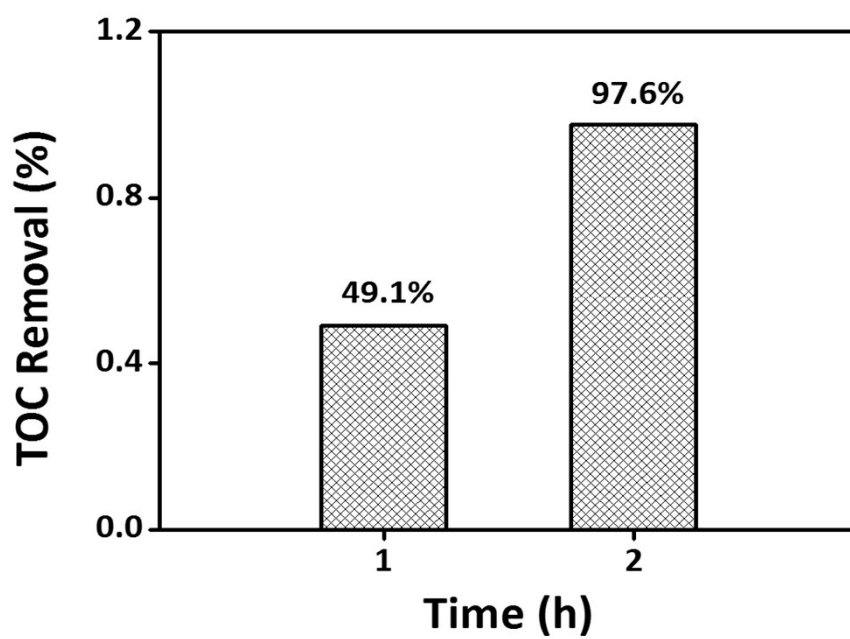

**Fig. S3** Total organic carbon removal during photocatalytic degradation of RhB with **BMO-2** under visible light irradiation.

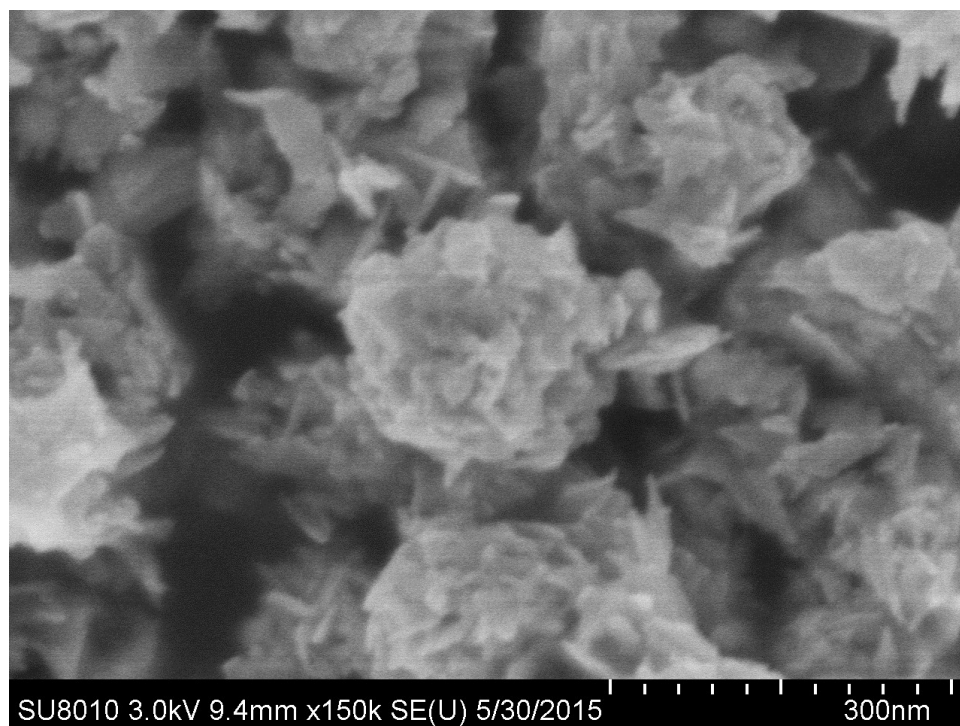

**Fig. S4** SEM image of **BMO-2** after four consecutive photodegradation cycles.

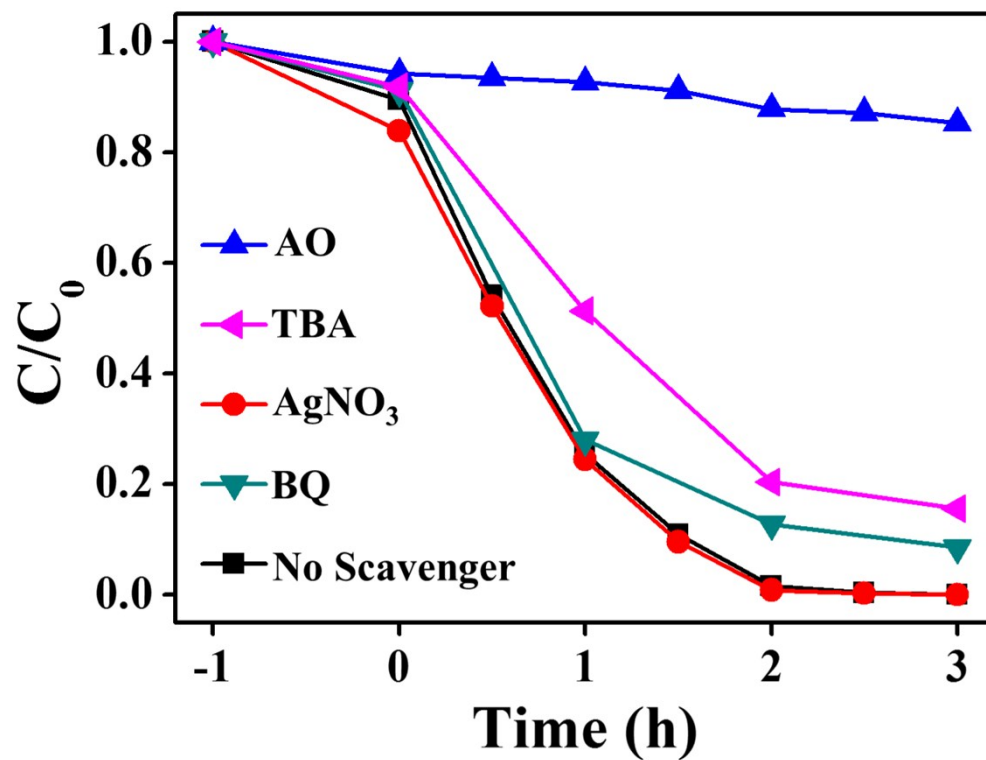

**Fig. S5** Photodegradation of RhB over **BMO-2** in the presence of different scavengers: 1, 4-benzoquinone (BQ), ammonium oxalate (AO),  $AgNO_3$ , and tert-butyl alcohol (TBA) under visible light irradiation.

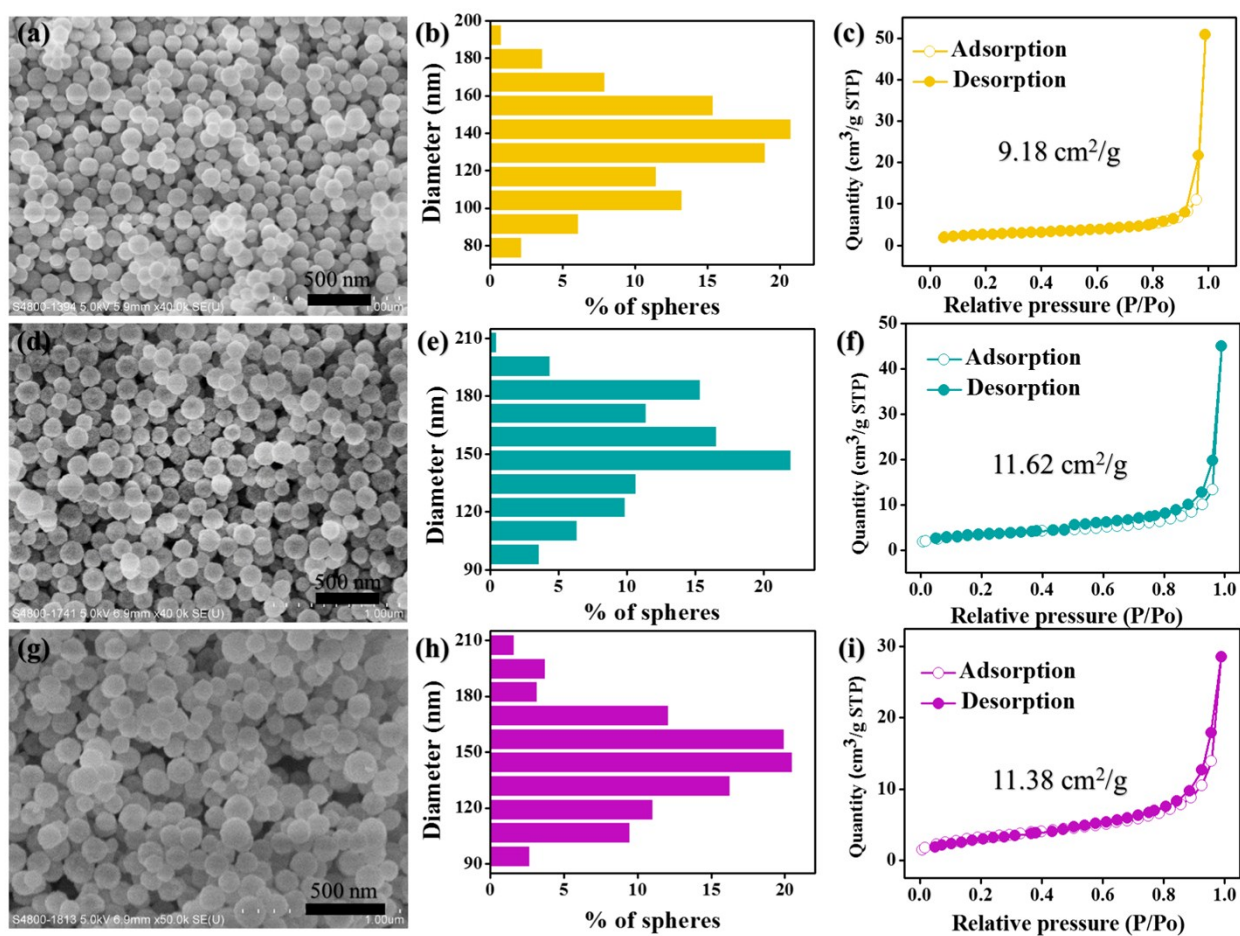

**Fig. S6** SEM images, size distribution histograms and  $\text{N}_2$  adsorption-desorption isotherms of  $\text{Bi}_2\text{O}_3$  (a-c),  $\text{Bi}_2\text{O}_3/\text{Bi}_2\text{WO}_6$  heterostructure (d-f) and  $\text{Bi}_2\text{WO}_6$  (g-i).

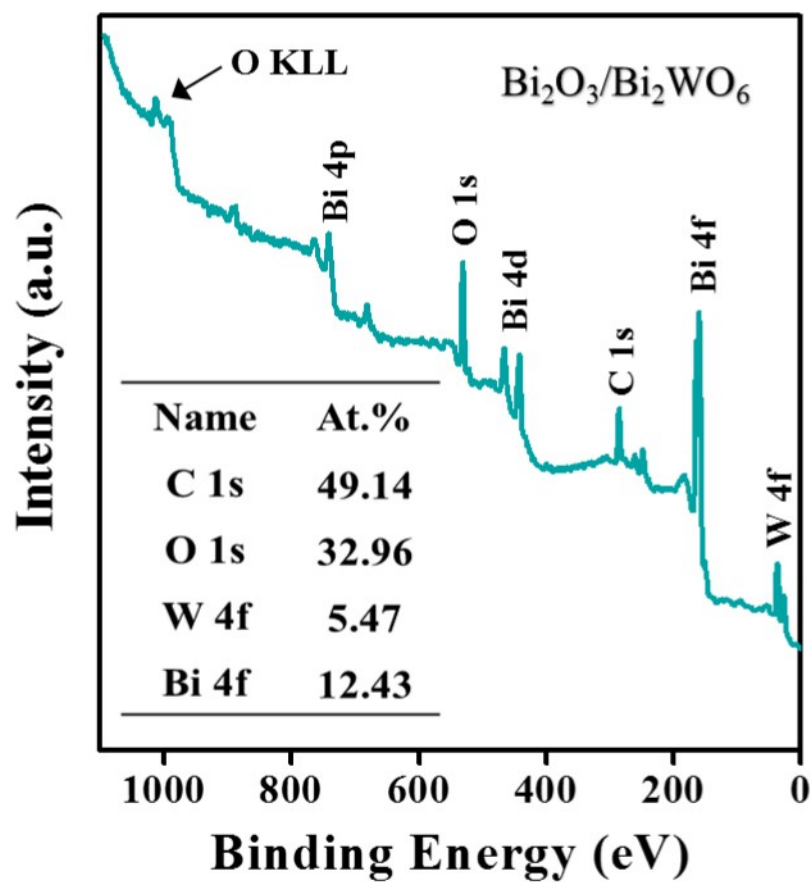

**Fig. S7** XPS spectra of Bi<sub>2</sub>O<sub>3</sub>/Bi<sub>2</sub>WO<sub>6</sub> heterostructure.



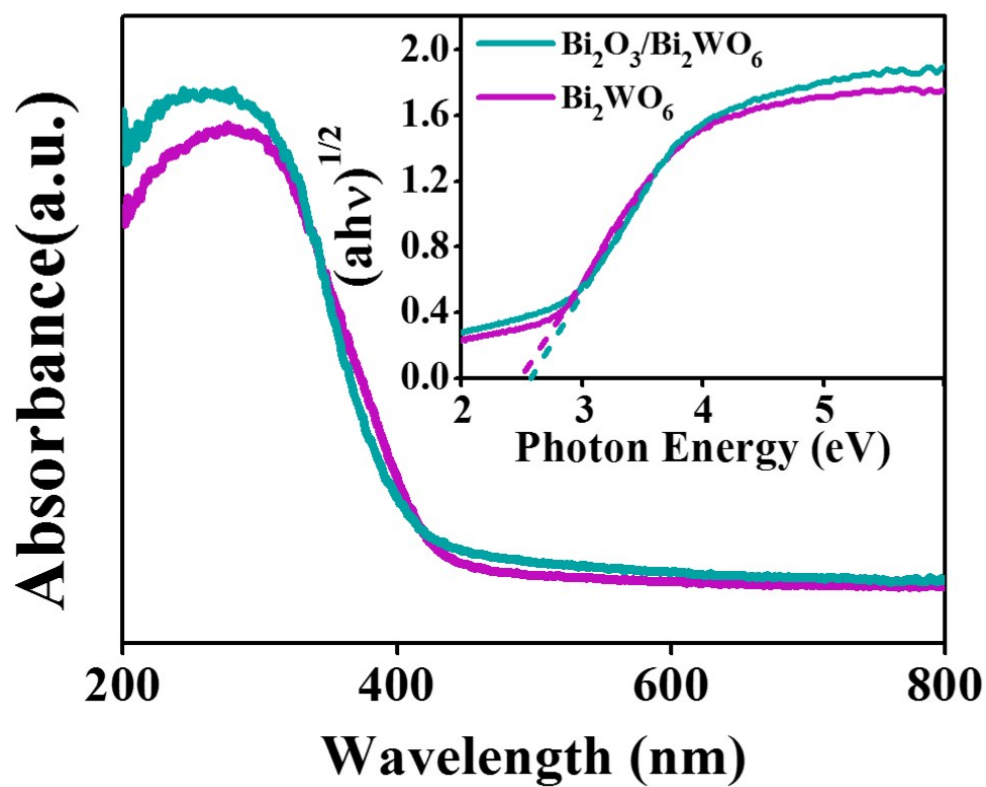

**Fig. S8** UV-vis diffuse reflectance spectra of pure  $\text{Bi}_2\text{WO}_6$  and  $\text{Bi}_2\text{O}_3/\text{Bi}_2\text{WO}_6$  heterostructure.

Inset is the plot of transformed Kubelka-Munk function versus light energy.
